# Supplementary material
Source: PubMed Central journal article supplement (PMC5411109)
Supplement: ci6b00518_si_001.pdf [file ci6b00518_si_001.pdf]

# Supporting Information

## Predicting Drug-Induced Cholestasis with the Help of Hepatic Transporters – An *in silico* Modeling Approach

Eleni Kotsampasakou and Gerhard F. Ecker\*

University of Vienna, Department of Pharmaceutical Chemistry, Althanstrasse 14, 1090 Vienna,  
Austria

\*e-mail: [gerhard.f.ecker@univie.ac.at](mailto:gerhard.f.ecker@univie.ac.at)

### List of Contents

|                                                                                                                                                                    |     |
|--------------------------------------------------------------------------------------------------------------------------------------------------------------------|-----|
| <b>Table S1:</b> List of descriptors used for modeling cholestasis .....                                                                                           | 1-5 |
| <b>Table S2:</b> Information for the transporter models for BSEP, BCRP, P-gp, OATP1B1 and 1B3 inhibition.....                                                      | 6   |
| <b>Table S3:</b> Number of reliable predictions for each model (cholestasis and transporters)-Applicability domain.....                                            | 6   |
| <b>Table S4:</b> Performance of the model trained on the merged data for cholestasis (1904 compounds) and respective p-values .....                                | 7   |
| <b>Table S5:</b> p-values from the respective two-sample t-tests comparing several model-pairs, bases on the usage of transporters predictions as descriptors..... | 8   |

Table S1: List of the 93 molecular 2D MOE descriptors and the 5 descriptors for BSEP, BCRP, P-gp, OATP1B1 and 1B3 inhibition prediction used for the cholestasis classification model for human data.

|   | MOE Descriptor | Description                                                                                                   |
|---|----------------|---------------------------------------------------------------------------------------------------------------|
| 1 | apol           | Sum of the atomic polarizabilities (including implicit hydrogens) with polarizabilities taken from [CRC 1994] |

|    |          |                                                                                                                                                                                                                                                                                                                                                                                     |
|----|----------|-------------------------------------------------------------------------------------------------------------------------------------------------------------------------------------------------------------------------------------------------------------------------------------------------------------------------------------------------------------------------------------|
| 2  | a_acc    | Number of hydrogen bond acceptor atoms (not counting acidic atoms but counting atoms that are both hydrogen bond donors and acceptors such as -OH).                                                                                                                                                                                                                                 |
| 3  | a_acid   | Number of acidic atoms.                                                                                                                                                                                                                                                                                                                                                             |
| 4  | a_aro    | Number of aromatic atoms.                                                                                                                                                                                                                                                                                                                                                           |
| 5  | a_count  | Number of atoms (including implicit hydrogens). This is calculated as the sum of $(1 + h_i)$ over all non-trivial atoms $i$ .                                                                                                                                                                                                                                                       |
| 6  | a_don    | Number of hydrogen bond donor atoms (not counting basic atoms but counting atoms that are both hydrogen bond donors and acceptors such as -OH).                                                                                                                                                                                                                                     |
| 7  | a_donacc | Number of hydrogen bond donor and hydrogen bond acceptor atoms.                                                                                                                                                                                                                                                                                                                     |
| 8  | a_heavy  | Number of heavy atoms $\#\{Z_i \mid Z_i > 1\}$ .                                                                                                                                                                                                                                                                                                                                    |
| 9  | a_hyd    | Number of hydrophobic atoms.                                                                                                                                                                                                                                                                                                                                                        |
| 10 | a_IC     | Atom information content (total). This is calculated to be a_ICM times $n$ .                                                                                                                                                                                                                                                                                                        |
| 11 | a_ICM    | Atom information content (mean). This is the entropy of the element distribution in the molecule (including implicit hydrogens but not lone pair pseudo-atoms). Let $n_i$ be the number of occurrences of atomic number $i$ in the molecule. Let $p_i = n_i / n$ where $n$ is the sum of the $n_i$ . The value of a_ICM is the negative of the sum over all $i$ of $p_i \log p_i$ . |
| 12 | a_nBr    | Number of bromine atoms: $\#\{Z_i \mid Z_i = 35\}$ .                                                                                                                                                                                                                                                                                                                                |
| 13 | a_nC     | Number of carbon atoms: $\#\{Z_i \mid Z_i = 6\}$ .                                                                                                                                                                                                                                                                                                                                  |
| 14 | a_nCl    | Number of chlorine atoms: $\#\{Z_i \mid Z_i = 17\}$ .                                                                                                                                                                                                                                                                                                                               |
| 15 | a_nF     | Number of fluorine atoms: $\#\{Z_i \mid Z_i = 9\}$ .                                                                                                                                                                                                                                                                                                                                |
| 16 | a_nH     | Number of hydrogen atoms (including implicit hydrogens). This is calculated as the sum of $h_i$ over all non-trivial atoms $i$ plus the number of non-trivial hydrogen atoms.                                                                                                                                                                                                       |
| 17 | A_nI     | Number of iodine atoms: $\#\{Z_i \mid Z_i = 53\}$ .                                                                                                                                                                                                                                                                                                                                 |
| 18 | a_nN     | Number of nitrogen atoms: $\#\{Z_i \mid Z_i = 7\}$ .                                                                                                                                                                                                                                                                                                                                |
| 19 | a_nO     | Number of oxygen atoms: $\#\{Z_i \mid Z_i = 8\}$ .                                                                                                                                                                                                                                                                                                                                  |
| 20 | a_nP     | Number of phosphorus atoms: $\#\{Z_i \mid Z_i = 15\}$ .                                                                                                                                                                                                                                                                                                                             |
| 21 | a_nS     | Number of sulfur atoms: $\#\{Z_i \mid Z_i = 16\}$ .                                                                                                                                                                                                                                                                                                                                 |
| 22 | bpol     | Sum of the absolute value of the difference between atomic polarizabilities of all bonded atoms in the molecule (including implicit hydrogens) with polarizabilities taken from [CRC 1994].                                                                                                                                                                                         |
| 23 | b_1rotN  | Number of rotatable single bonds. Conjugated single bonds are not included (e.g. ester and peptide bonds).                                                                                                                                                                                                                                                                          |
| 24 | b_1rotR  | Fraction of rotatable single bonds: b_1rotN divided by b_heavy.                                                                                                                                                                                                                                                                                                                     |
| 25 | b_ar     | Number of aromatic bonds.                                                                                                                                                                                                                                                                                                                                                           |
| 26 | b_count  | Number of bonds (including implicit hydrogens). This is calculated as the sum of $(d_i/2 + h_i)$ over all non-trivial atoms $i$ .                                                                                                                                                                                                                                                   |
| 27 | b_double | Number of double bonds. Aromatic bonds are not considered to                                                                                                                                                                                                                                                                                                                        |

|    |                |                                                                                                                                                                                                                                    |
|----|----------------|------------------------------------------------------------------------------------------------------------------------------------------------------------------------------------------------------------------------------------|
|    |                | be double bonds.                                                                                                                                                                                                                   |
| 28 | b_heavy        | Number of bonds between heavy atoms.                                                                                                                                                                                               |
| 29 | b_max1len      | Maximum single bond chain length.                                                                                                                                                                                                  |
| 30 | b_rotN         | Number of rotatable bonds. A bond is rotatable if it has order 1, is not in a ring, and has at least two heavy neighbors.                                                                                                          |
| 31 | b_rotR         | Fraction of rotatable bonds: b_rotN divided by b_heavy.                                                                                                                                                                            |
| 32 | b_single       | Number of single bonds (including implicit hydrogens). Aromatic bonds are not considered to be single bonds.                                                                                                                       |
| 33 | b_triple       | Number of triple bonds. Aromatic bonds are not considered to be triple bonds.                                                                                                                                                      |
| 34 | chiral_u       | The number of unconstrained chiral centers.                                                                                                                                                                                        |
| 35 | density        | Molecular mass density: Weight divided by vdw_vol (amu/Å <sup>3</sup> ).                                                                                                                                                           |
| 36 | diameter       | Largest value in the distance matrix [Petitjean 1992]                                                                                                                                                                              |
| 37 | lip_acc        | The number of O and N atoms.                                                                                                                                                                                                       |
| 38 | lip_don        | The number of OH and NH atoms.                                                                                                                                                                                                     |
| 39 | logP(o/w)      | Log of the octanol/water partition coefficient (including implicit hydrogens). This property is calculated from a linear atom type model [LOGP 1998] with $r^2 = 0.931$ , RMSE=0.393 on 1,827 molecules.                           |
| 40 | logS           | Log of the aqueous solubility (mol/L). This property is calculated from an atom contribution linear atom type model [Hou 2004] with $r^2 = 0.90$ , ~1,200 molecules.                                                               |
| 41 | mr             | Molecular refractivity (including implicit hydrogens). This property is calculated from an 11 descriptor linear model [MREF 1998] with $r^2 = 0.997$ , RMSE = 0.168 on 1,947 small molecules.                                      |
| 42 | PC+            | Total positive partial charge: the sum of the positive $q_i$ . Q_PC+ is identical to PC+ which has been retained for compatibility.                                                                                                |
| 43 | PC-            | Total negative partial charge: the sum of the negative $q_i$ . Q_PC- is identical to PC- which has been retained for compatibility.                                                                                                |
| 44 | PEOE_PC+       | Total positive partial charge: the sum of the positive $q_i$ .                                                                                                                                                                     |
| 45 | Q_PC+          |                                                                                                                                                                                                                                    |
| 46 | PEOE_PC-       | Total negative partial charge: the sum of the negative $q_i$ .                                                                                                                                                                     |
| 47 | Q_PC-          |                                                                                                                                                                                                                                    |
| 48 | PEOE_RPC+      | Relative positive partial charge: the largest positive $q_i$ divided by the sum of the positive $q_i$ .                                                                                                                            |
| 49 | Q_RPC+         |                                                                                                                                                                                                                                    |
| 50 | PEOE_RPC-      | Relative negative partial charge: the smallest negative $q_i$ divided by the sum of the negative $q_i$ .                                                                                                                           |
| 51 | Q_RPC-         |                                                                                                                                                                                                                                    |
| 52 | PEOE_VSA_FHYD  | Fractional hydrophobic van der Waals surface area. This is the sum of the $v_i$ such that $ q_i $ is less than or equal to 0.2 divided by the total surface area. The $v_i$ are calculated using a connection table approximation. |
| 53 | Q_VSA_FHYD     |                                                                                                                                                                                                                                    |
| 54 | PEOE_VSA_FNEG  | Fractional negative van der Waals surface area. This is the sum of the $v_i$ such that $q_i$ is negative divided by the total surface area. The $v_i$ are calculated using a connection table approximation.                       |
| 55 | Q_VSA_FNEG     |                                                                                                                                                                                                                                    |
| 56 | PEOE_VSA_FPNEG | Fractional negative polar van der Waals surface area. This is the                                                                                                                                                                  |

|          |                               |                                                                                                                                                                                                                                                                                                                  |
|----------|-------------------------------|------------------------------------------------------------------------------------------------------------------------------------------------------------------------------------------------------------------------------------------------------------------------------------------------------------------|
| 57       | Q_VSA_FPNEG                   | sum of the $v_i$ such that $q_i$ is less than -0.2 divided by the total surface area. The $v_i$ are calculated using a connection table approximation.                                                                                                                                                           |
| 58<br>59 | PEOE_VSA_FPOL<br>Q_VSA_FPOL   | Fractional polar van der Waals surface area. This is the sum of the $v_i$ such that $ q_i $ is greater than 0.2 divided by the total surface area. The $v_i$ are calculated using a connection table approximation.                                                                                              |
| 60<br>61 | PEOE_VSA_FPOS<br>Q_VSA_FPOS   | Fractional positive van der Waals surface area. This is the sum of the $v_i$ such that $q_i$ is non-negative divided by the total surface area. The $v_i$ are calculated using a connection table approximation.                                                                                                 |
| 62<br>63 | PEOE_VSA_FPPOS<br>Q_VSA_FPPOS | Fractional positive polar van der Waals surface area. This is the sum of the $v_i$ such that $q_i$ is greater than 0.2 divided by the total surface area. The $v_i$ are calculated using a connection table approximation.                                                                                       |
| 64<br>65 | PEOE_VSA_HYD<br>Q_VSA_HYD     | Total hydrophobic van der Waals surface area. This is the sum of the $v_i$ such that $ q_i $ is less than or equal to 0.2. The $v_i$ are calculated using a connection table approximation.                                                                                                                      |
| 66<br>67 | PEOE_VSA_NEG<br>Q_VSA_NEG     | Total negative van der Waals surface area. This is the sum of the $v_i$ such that $q_i$ is negative. The $v_i$ are calculated using a connection table approximation.                                                                                                                                            |
| 68<br>69 | PEOE_VSA_PNEG<br>Q_VSA_PNEG   | Total negative polar van der Waals surface area. This is the sum of the $v_i$ such that $q_i$ is less than -0.2. The $v_i$ are calculated using a connection table approximation.                                                                                                                                |
| 70<br>71 | PEOE_VSA_POL<br>Q_VSA_POL     | Total polar van der Waals surface area. This is the sum of the $v_i$ such that $ q_i $ is greater than 0.2. The $v_i$ are calculated using a connection table approximation.                                                                                                                                     |
| 72<br>73 | PEOE_VSA_POS<br>Q_VSA_POS     | Total positive van der Waals surface area. This is the sum of the $v_i$ such that $q_i$ is non-negative. The $v_i$ are calculated using a connection table approximation.                                                                                                                                        |
| 74<br>75 | PEOE_VSA_PPOS<br>Q_VSA_PPOS   | Total positive polar van der Waals surface area. This is the sum of the $v_i$ such that $q_i$ is greater than 0.2. The $v_i$ are calculated using a connection table approximation.                                                                                                                              |
| 76       | radius                        | If $r_i$ is the largest matrix entry in row $i$ of the distance matrix $D$ , then the radius is defined as the smallest of the $r_i$ [Petitjean 1992].                                                                                                                                                           |
| 77       | reactive                      | Indicator of the presence of reactive groups. A non-zero value indicates that the molecule contains a reactive group. The table of reactive groups is based on the Oprea set [Oprea 2000] and includes metals, phospho-, N/O/S-N/O/S single bonds, thiols, acyl halides, Michael Acceptors, azides, esters, etc. |
| 78       | rings                         | The number of rings.                                                                                                                                                                                                                                                                                             |
| 79       | RPC+                          | Relative positive partial charge.                                                                                                                                                                                                                                                                                |
| 80       | RPC-                          | Relative negative partial charge.                                                                                                                                                                                                                                                                                |
| 81       | SlogP                         | Log of the octanol/water partition coefficient (including implicit hydrogens). This property is an atomic contribution model [Crippen 1999] that calculates logP from the given structure; i.e.                                                                                                                  |

|    |                         |                                                                                                                                                                                                                                                                            |
|----|-------------------------|----------------------------------------------------------------------------------------------------------------------------------------------------------------------------------------------------------------------------------------------------------------------------|
|    |                         | the correct protonation state (washed structures). Results may vary from the logP(o/w) descriptor. The training set for SlogP was ~7000 structures.                                                                                                                        |
| 82 | SMR                     | Molecular refractivity (including implicit hydrogens). This property is an atomic contribution model [Crippen 1999] that assumes the correct protonation state (washed structures). The model was trained on ~7000 structures and results may vary from the mr descriptor. |
| 83 | TPSA                    | Polar surface area ( $\text{\AA}^2$ ) calculated using group contributions to approximate the polar surface area from connection table information only. The parameterization is that of Ertl <i>et al.</i> [Ertl 2000].                                                   |
| 84 | vdw_area                | Area of van der Waals surface ( $\text{\AA}^2$ ) calculated using a connection table approximation.                                                                                                                                                                        |
| 85 | vdw_vol                 | van der Waals volume ( $\text{\AA}^3$ ) calculated using a connection table approximation.                                                                                                                                                                                 |
| 86 | vsa_acc                 | Approximation to the sum of VDW surface areas ( $\text{\AA}^2$ ) of pure hydrogen bond acceptors (not counting acidic atoms and atoms that are both hydrogen bond donors and acceptors such as -OH).                                                                       |
| 87 | vsa_acid                | Approximation to the sum of VDW surface areas of acidic atoms ( $\text{\AA}^2$ ).                                                                                                                                                                                          |
| 88 | vsa_don                 | Approximation to the sum of VDW surface areas of pure hydrogen bond donors (not counting basic atoms and atoms that are both hydrogen bond donors and acceptors such as -OH) ( $\text{\AA}^2$ ).                                                                           |
| 89 | vsa_hyd                 | Approximation to the sum of VDW surface areas of hydrophobic atoms ( $\text{\AA}^2$ ).                                                                                                                                                                                     |
| 90 | vsa_other               | Approximation to the sum of VDW surface areas ( $\text{\AA}^2$ ) of atoms typed as "other".                                                                                                                                                                                |
| 91 | vsa_pol                 | Approximation to the sum of VDW surface areas ( $\text{\AA}^2$ ) of polar atoms (atoms that are both hydrogen bond donors and acceptors), such as -OH.                                                                                                                     |
| 92 | Weight                  | Molecular weight (including implicit hydrogens) in atomic mass units with atomic weights taken from [CRC 1994].                                                                                                                                                            |
| 93 | zagreb                  | Zagreb index: the sum of $d_i^2$ over all heavy atoms $i$ .                                                                                                                                                                                                                |
| 94 | ABCB1 Inhib             | P-gP inhibition prediction (float number score)                                                                                                                                                                                                                            |
| 95 | ABCG2 Inhib             | BCRP inhibition prediction (float number score)                                                                                                                                                                                                                            |
| 96 | BSEP Inhib              | BSEP inhibition prediction (float number score)                                                                                                                                                                                                                            |
| 97 | OATPB1_Inhib_Sum_binary | Sum of the binary scores of the 4 classification models for OATPB1 inhibition (integer score between 0 and 4)                                                                                                                                                              |
| 98 | OATPB3_Inhib_Sum_binary | Sum of the binary scores of the 4 classification models for OATPB3 inhibition (integer score between 0 and 4)                                                                                                                                                              |

Table S2: Information for the transporter models for BSEP, BCRP, P-gp, OATP1B1 and 1B3 inhibition. The size of training set, the threshold of inhibition definition for the training set, the algorithm used and the AUC of the model are provided.

| <b>Transporter Inhibition Model</b>   | <b>Training set (compounds' number)</b> | <b>Threshold of inhibition for IC<sub>50</sub> values</b>                                                                           | <b>Algorithm</b>                                               | <b>AUC</b>               |
|---------------------------------------|-----------------------------------------|-------------------------------------------------------------------------------------------------------------------------------------|----------------------------------------------------------------|--------------------------|
| <b>BSEP</b>                           | 670                                     | <10 $\mu$ M: inhibitors<br>>50 $\mu$ M: noninhibitors<br>10 $\mu$ M $\leq$ IC <sub>50</sub> $\leq$ 50 $\mu$ M:<br>compounds removed | RF (10 trees) with feature selection                           | 0.91 (10-fold CV)        |
| <b>BCRP</b>                           | 978                                     | 10 $\mu$ M                                                                                                                          | Logistic regression                                            | 0.90 (10-fold CV)        |
| <b>P-gp</b>                           | 1180                                    | 10 $\mu$ M                                                                                                                          | SVM                                                            | 0.94 (10-fold CV)        |
| <b>OATP1B1 (ensemble of 4 models)</b> | 1708                                    | 10 $\mu$ M                                                                                                                          | MetaCost8:1 +RF (10 trees)<br>MetaCost8:1 + SMO (Puk kernel)   | 0.790-0.806 (10-fold CV) |
| <b>OATP1B3 (ensemble of 4 models)</b> | 1725                                    | 10 $\mu$ M                                                                                                                          | MetaCost13:1 +RF (10 trees)<br>MetaCost13:1 + SMO (Puk kernel) | 0.825-0.866 (10-fold CV) |

Table S3: Number of reliable predictions for the cholestasis data for each model based on applicability domain defined according the Euclidean distances between training and test set. Since the model of BSEP inhibition was generated with confidential training data, we cannot report the exact number of reliable predictions.

| <b>Model</b>              | <b>Number of Reliable Predictions for Cholestasis Training set 578 compounds</b> | <b>Number of Reliable Predictions for Cholestasis Test Set 1347 compounds</b> | <b>Number of Reliable Predictions for Cholestasis Merged Training Set 1904 compounds</b> |
|---------------------------|----------------------------------------------------------------------------------|-------------------------------------------------------------------------------|------------------------------------------------------------------------------------------|
| <b>BSEP inhibition</b>    | confidential                                                                     | confidential                                                                  | confidential                                                                             |
| <b>BCRP inhibition</b>    | 562/578 (97.2%)                                                                  | 1290/1347 (95.8%)                                                             | 1831/1904 (93.9%)                                                                        |
| <b>P-gp inhibition</b>    | 557/578 (95.8%)                                                                  | 1254/1347 (93.1%)                                                             | 1788/1904 (96.2%)                                                                        |
| <b>OATP1B1 inhibition</b> | 574/578 (99.3%)                                                                  | 1342/1347 (99.5%)                                                             | 1895/1904 (99.5%)                                                                        |
| <b>OATP1B3 inhibition</b> | 574/578 (99.3%)                                                                  | 1342/1347 (99.5%)                                                             | 1895/1904 (99.5%)                                                                        |
| <b>Cholestasis</b>        | -                                                                                | 1331/1347 (98.8%)                                                             | -                                                                                        |

Table S4. Performance of the model trained on the merged data for cholestasis (1904 compounds) and respective p-values. The performance is obtained from 50 iterations for 10-fold cross validation using 93 2D MOE descriptors, with or without transporters predictions and it is provided for accuracy, sensitivity, specificity, AUC and precision. The p-values were obtained by performing a two-sample paired t-test. The model was generated using MetaCost with a cost matrix of [0.0, 1.0; 5.0, 0.0] and SVM as a base classifier using Polynomial kernel (exp=2).

|                                  | <b>Accuracy</b>        | <b>Sensitivity</b>      | <b>Specificity</b>     | <b>AUC</b>             | <b>Precision</b>       |
|----------------------------------|------------------------|-------------------------|------------------------|------------------------|------------------------|
| <b>93 2D MOE descriptors</b>     | 0.690                  | 0.595                   | 0.711                  | 0.726                  | 0.321                  |
| <b>+Transporters predictions</b> | ±0.007                 | ±0.013                  | ±0.008                 | ±0.005                 | ±0.008                 |
| <b>93 2D MOE descriptors</b>     | 0.670                  | 0.574                   | 0.692                  | 0.690                  | 0.299                  |
|                                  | ±0.007                 | ±0.014                  | ±0.008                 | ±0.006                 | ±0.007                 |
| <b>p-value</b>                   | <2.2*10 <sup>-16</sup> | 7.949*10 <sup>-12</sup> | <2.2*10 <sup>-16</sup> | <2.2*10 <sup>-16</sup> | <2.2*10 <sup>-16</sup> |

Table S5. p-values from the respective two-sample t-tests comparing several model-pairs, bases on the usage of transporters predictions as descriptors (dscrs). The compared statistics metrics are accuracy, sensitivity, specificity, MCC, AUC, precision and weighted average precision. The outcome for each comparison is also provided in the conclusions column.

| Comparisons                                                                                                   | Accuracy         | Sensitivity     | Specificity     | MCC             | AUC             | Precision       | Weighted Precision | Conclusions                                                                                                                                                                                                                                            |
|---------------------------------------------------------------------------------------------------------------|------------------|-----------------|-----------------|-----------------|-----------------|-----------------|--------------------|--------------------------------------------------------------------------------------------------------------------------------------------------------------------------------------------------------------------------------------------------------|
| <b>p-values:</b><br>i)comparison 93 2D<br>dscrs + transp vs 93<br>2D dsrs                                     | $<2.2*10^{-16}$  | $<2.2*10^{-16}$ | $9.977*10^{-4}$ | $<2.2*10^{-16}$ | $<2.2*10^{-16}$ | $<2.2*10^{-16}$ | $<2.2*10^{-16}$    | For <u>all statistics metrics</u> , using 93 2D dscrs + transporters performs better                                                                                                                                                                   |
| <b>p-values:</b><br>ii)comparison 93 2D<br>dscrs + BSEP vs 93 2D<br>dsrs                                      | $5.786*10^{-7}$  | 0.01742         | $5.8*10^{-11}$  | 0.1766          | 0.537           | 0.001289        | 0.3734             | In terms of <u>MCC</u> , <u>AUC</u> and <u>weighted precision</u> , the two models perform equally.<br>For the <u>rest of the statistics metrics</u> , including BSEP to the 93 2D dscrs yields better performance.                                    |
| <b>p-values:</b><br>iii)comparison 93 2D<br>dscrs + transp vs 93<br>2D dscrs + BSEP                           | $9.151*10^{-10}$ | $<2.2*10^{-16}$ | $6.117*10^{-4}$ | $<2.2*10^{-16}$ | $<2.2*10^{-16}$ | $<2.2*10^{-16}$ | $<2.2*10^{-16}$    | For <u>all statistics metrics</u> using 93 2D dscrs + transporters performs better than using only BSEP.                                                                                                                                               |
| <b>p-values:</b><br>iv)comparison 93 2D<br>dscrs + transp vs 93<br>2D dscrs +<br>transporters without<br>BSEP | $9.387*10^{-4}$  | 0.07589         | $2.021*10^{-6}$ | 0.3016          | $1.411*10^{-6}$ | $6.253*10^{-3}$ | 0.01355            | For <u>accuracy</u> , <u>specificity</u> , <u>AUC</u> , <u>precision</u> and <u>weighted precision</u> the performance of the model is better when all transporters are used.<br>For <u>sensitivity</u> and <u>MCC</u> the two models perform equally. |

When p-values are too small to calculate, the < sign is introduced.
